# Supplementary material for: Baculovirus Display of Varicella–Zoster Virus Glycoprotein E Induces Robust Humoral and Cellular Immune Responses in Mice
Source: MDPI journal article supplement (doi:10.3390/v14081785), 2022-08-16
Supplement: s1 [file s1]

## Supplementary Materials

### Baculovirus Display of Varicella-Zoster Virus Glycoprotein E induces Robust Humoral and Cellular Immune Responses in Mice

Wenhui Xue <sup>1,2,†</sup>, Tingting Li <sup>1,2,†</sup>, Sibozhang <sup>1,2,†</sup>, Yingbin Wang <sup>1,2,†</sup>, Minqing Hong <sup>1,2</sup>, Lingyan Cui <sup>1,2</sup>, Hong Wang <sup>1,2</sup>, Yuyun Zhang <sup>1,2</sup>, Tingting Chen <sup>1,2</sup>, Rui Zhu <sup>1,2</sup>, Zhenqin Chen <sup>1,2</sup>, Lizhi Zhou <sup>1,2</sup>, Rongwei Zhang <sup>1,2</sup>, Tong Cheng <sup>1,2</sup>, Qingbing Zheng <sup>1,2</sup>, Jun Zhang <sup>1,2</sup>, Ying Gu <sup>1,2,\*</sup>, Ningshao Xia <sup>1,2,\*</sup> and Shaowei Li <sup>1,2,\*</sup>

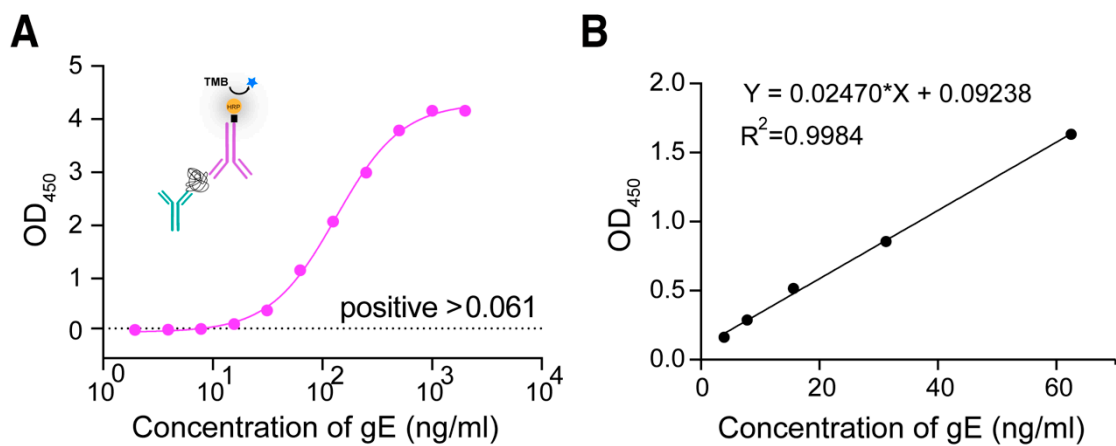

**Figure S1.** The quantitative estimation of gE proteins was executed by sandwich ELISA. **(A)** Sandwich ELISA using gE-specific antibody 4A2 as the capture antibody and 6H6 (HRP-labeled) as the detection antibody to quantitatively determine the level of gE protein expression. **(B)** Membrane-anchored gE concentration as determined using the established linear curve ( $R^2 = 0.9984$ ).

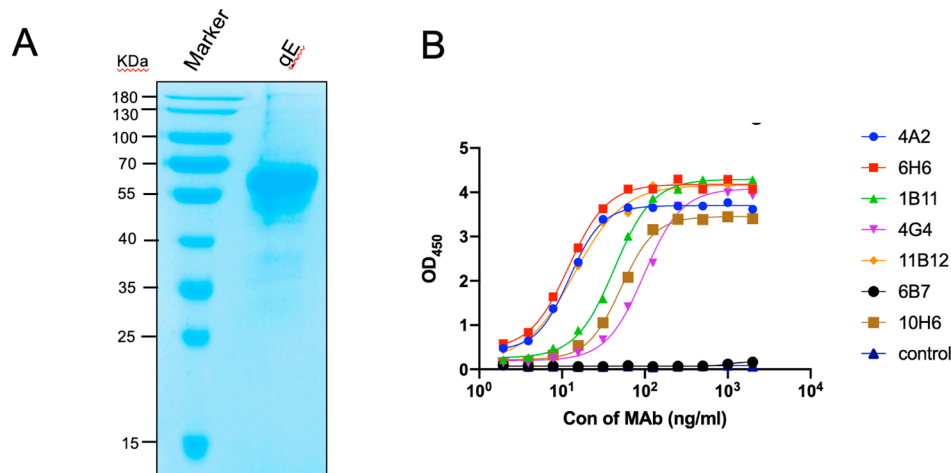

**Figure S2.** Preparation and Characterization of gE proteins. **(A)** SDS-PAGE analysis of recombinant gE protein produced by insect cells. **(B)** Binding reactivities of recombinant gE protein to VZV-specific antibodies.
